# Supplementary material for: Mathematical models for devising the optimal Ebola virus disease eradication
Source: Springer Nature journal article supplement (doi:10.1186/s12967-017-1224-6), 2017-06-01
Supplement: MOESM1 [file 12332542]

# Mathematical Models for Devising the Optimal Ebola Virus Disease Eradication

Shuo Jiang<sup>1,2,#</sup>, Kaiqin Wang<sup>3,#</sup>, Chaoqun, Li<sup>4,#</sup>, Guangbin Hong<sup>5,#</sup>, Xuan Zhang<sup>1</sup>,  
MenglinShan<sup>1</sup>, Hongbin Li<sup>3</sup>, Jin Wang<sup>1,\*</sup>

<sup>1</sup>Scientific Research Center, Shanghai Public Health Clinical Center, Fudan University, 2901 Caolang Road, Jinshan District, Shanghai 201508, China; <sup>2</sup>Faculty of Business and Economics, The University of Hong Kong, Pokfulam, Hong Kong, China; <sup>3</sup>Department of Dermatology, First Affiliated Hospital of Kunming Medical University, 295 Xichang Road, Kunming, 650032, Yunnan, China; <sup>4</sup>Department of Infectious Diseases, Shanghai Public Health Clinical Center, Fudan University, Shanghai, China; <sup>5</sup>Department of Economics, Tufts University, 8 Upper Campus Road, Braker Hall, Medford, MA 02155, USA.

## Supplementary Tables:

1. Table S1: Ebola cumulative reported cases in Guinea, Liberia, and Sierra Leone.

| WHO report date | Total Cases, Guinea | Total Deaths, Guinea | Total Cases, Liberia | Total Deaths, Liberia | Total Cases, Sierra Leone | Total Deaths, Sierra Leone |
|-----------------|---------------------|----------------------|----------------------|-----------------------|---------------------------|----------------------------|
| 2014/3/1        | 0                   | 0                    | 0                    | 0                     | 0                         | 0                          |
| 2014/3/2        | 0                   | 0                    | 0                    | 0                     | 0                         | 0                          |
| 2014/3/3        | 0                   | 0                    | 0                    | 0                     | 0                         | 0                          |
| 2014/3/4        | 0                   | 0                    | 0                    | 0                     | 0                         | 0                          |
| 2014/3/5        | 0                   | 0                    | 0                    | 0                     | 0                         | 0                          |
| 2014/3/6        | 0                   | 0                    | 0                    | 0                     | 0                         | 0                          |
| 2014/3/7        | 0                   | 0                    | 0                    | 0                     | 0                         | 0                          |
| 2014/3/8        | 0                   | 0                    | 0                    | 0                     | 0                         | 0                          |
| 2014/3/9        | 0                   | 0                    | 0                    | 0                     | 0                         | 0                          |

|           |     |     |     |     |     |     |
|-----------|-----|-----|-----|-----|-----|-----|
| 2014/3/10 | 0   | 0   | 0   | 0   | 0   | 0   |
| 2014/3/11 | 0   | 0   | 0   | 0   | 0   | 0   |
| 2014/3/12 | 0   | 0   | 0   | 0   | 0   | 0   |
| 2014/3/13 | 0   | 0   | 0   | 0   | 0   | 0   |
| 2014/3/14 | 0   | 0   | 0   | 0   | 0   | 0   |
| 2014/3/15 | 0   | 0   | 0   | 0   | 0   | 0   |
| 2014/3/16 | 0   | 0   | 0   | 0   | 0   | 0   |
| 2014/3/17 | 0   | 0   | 0   | 0   | 0   | 0   |
| 2014/3/18 | 0   | 0   | 0   | 0   | 0   | 0   |
| 2014/3/19 | 0   | 0   | 0   | 0   | 0   | 0   |
| 2014/3/20 | 0   | 0   | 0   | 0   | 0   | 0   |
| 2014/3/21 | 0   | 0   | 0   | 0   | 0   | 0   |
| 2014/3/22 | 0   | 0   | 0   | 0   | 0   | 0   |
| 2014/3/23 | 0   | 0   | 0   | 0   | 0   | 0   |
| 2014/3/24 | 0   | 0   | 0   | 0   | 0   | 0   |
| 2014/3/25 | 86  | 59  | 0   | 0   | 0   | 0   |
| 2014/3/26 | 86  | 60  | 0   | 0   | 0   | 0   |
| 2014/3/27 | 103 | 66  | 8   | 6   | 6   | 5   |
| 2014/3/31 | 112 | 70  | 8   | 6   | 0   | 0   |
| 2014/4/1  | 122 | 80  | 8   | 2   | 0   | 0   |
| 2014/4/2  | 127 | 83  | 8   | 5   | 0   | 0   |
| 2014/4/7  | 151 | 95  | 18  | 7   | 0   | 0   |
| 2014/4/10 | 157 | 101 | 22  | 14  | 0   | 0   |
| 2014/4/17 | 197 | 122 | 27  | 13  | 0   | 0   |
| 2014/4/21 | 203 | 129 | 27  | 13  | 0   | 0   |
| 2014/4/23 | 208 | 136 | 34  | 11  | 0   | 0   |
| 2014/4/30 | 221 | 146 | 13  | 11  | 0   | 0   |
| 2014/5/5  | 231 | 155 | 13  | 11  | 0   | 0   |
| 2014/5/14 | 233 | 157 | 12  | 11  | 0   | 0   |
| 2014/5/23 | 258 | 174 | 12  | 9   | 0   | 0   |
| 2014/5/27 | 258 | 174 | 12  | 9   | 1   | 4   |
| 2014/5/28 | 281 | 186 | 12  | 9   | 16  | 5   |
| 2014/6/2  | 291 | 193 | 13  | 9   | 50  | 6   |
| 2014/6/5  | 344 | 215 | 13  | 9   | 81  | 7   |
| 2014/6/10 | 372 | 236 | 15  | 10  | 89  | 7   |
| 2014/6/11 | 376 | 241 | 15  | 10  | 117 | 19  |
| 2014/6/18 | 398 | 264 | 33  | 24  | 97  | 49  |
| 2014/6/24 | 390 | 270 | 51  | 34  | 158 | 34  |
| 2014/7/2  | 413 | 303 | 107 | 65  | 239 | 99  |
| 2014/7/7  | 412 | 305 | 115 | 75  | 252 | 101 |
| 2014/7/8  | 408 | 307 | 131 | 84  | 305 | 127 |
| 2014/7/14 | 409 | 309 | 142 | 88  | 337 | 142 |
| 2014/7/16 | 406 | 304 | 172 | 105 | 386 | 192 |

|            |      |      |      |      |      |      |
|------------|------|------|------|------|------|------|
| 2014/7/21  | 410  | 310  | 196  | 116  | 442  | 206  |
| 2014/7/24  | 415  | 314  | 224  | 127  | 454  | 219  |
| 2014/7/28  | 427  | 319  | 249  | 129  | 525  | 224  |
| 2014/7/31  | 460  | 339  | 329  | 156  | 533  | 233  |
| 2014/8/3   | 472  | 346  | 391  | 227  | 574  | 252  |
| 2014/8/4   | 485  | 358  | 486  | 255  | 646  | 273  |
| 2014/8/8   | 495  | 367  | 554  | 294  | 717  | 298  |
| 2014/8/12  | 506  | 373  | 599  | 323  | 730  | 315  |
| 2014/8/13  | 510  | 377  | 670  | 355  | 783  | 334  |
| 2014/8/15  | 519  | 380  | 786  | 348  | 810  | 348  |
| 2014/8/19  | 543  | 394  | 834  | 466  | 848  | 365  |
| 2014/8/21  | 579  | 396  | 972  | 576  | 907  | 374  |
| 2014/8/22  | 607  | 406  | 1082 | 624  | 910  | 392  |
| 2014/8/28  | 648  | 430  | 1378 | 694  | 1026 | 422  |
| 2014/9/6   | 812  | 517  | 1871 | 1089 | 1261 | 491  |
| 2014/9/8   | 862  | 555  | 2046 | 1224 | 1361 | 509  |
| 2014/9/12  | 861  | 557  | 2081 | 1137 | 1424 | 524  |
| 2014/9/16  | 936  | 595  | 2407 | 1296 | 1620 | 562  |
| 2014/9/18  | 942  | 601  | 2710 | 1459 | 1673 | 562  |
| 2014/9/22  | 1008 | 632  | 3022 | 1578 | 1813 | 593  |
| 2014/9/24  | 1022 | 635  | 3280 | 1677 | 1940 | 597  |
| 2014/9/26  | 1074 | 648  | 3458 | 1830 | 2021 | 605  |
| 2014/10/1  | 1157 | 710  | 3696 | 1998 | 2304 | 622  |
| 2014/10/3  | 1199 | 739  | 3834 | 2069 | 2437 | 623  |
| 2014/10/8  | 1298 | 768  | 3924 | 2210 | 2789 | 879  |
| 2014/10/10 | 1350 | 778  | 4076 | 2316 | 2950 | 930  |
| 2014/10/15 | 1472 | 843  | 4249 | 2458 | 3252 | 1183 |
| 2014/10/17 | 1519 | 862  | 4262 | 2484 | 3410 | 1200 |
| 2014/10/22 | 1540 | 904  | 4665 | 2705 | 3706 | 1359 |
| 2014/10/25 | 1553 | 926  | 4665 | 2705 | 3896 | 1281 |
| 2014/10/29 | 1906 | 997  | 6535 | 2413 | 5235 | 1500 |
| 2014/10/31 | 1667 | 1018 | 6535 | 2413 | 5338 | 1510 |
| 2014/11/5  | 1731 | 1041 | 6525 | 2697 | 4759 | 1070 |
| 2014/11/7  | 1760 | 1054 | 6619 | 2766 | 4862 | 1130 |
| 2014/11/12 | 1878 | 1142 | 6822 | 2836 | 5368 | 1169 |

|                |      |      |      |      |       |      |
|----------------|------|------|------|------|-------|------|
| 2014/11/1<br>4 | 1919 | 1166 | 6878 | 2812 | 5586  | 1187 |
| 2014/11/1<br>9 | 1971 | 1192 | 7069 | 2964 | 6073  | 1250 |
| 2014/11/2<br>1 | 2047 | 1214 | 7082 | 2963 | 6190  | 1267 |
| 2014/11/2<br>6 | 2134 | 1260 | 7168 | 3016 | 6599  | 1398 |
| 2014/11/2<br>8 | 2155 | 1312 | 7635 | 3145 | 7109  | 1530 |
| 2014/12/3      | 2164 | 1327 | 7635 | 3145 | 7312  | 1583 |
| 2014/12/1<br>0 | 2292 | 1428 | 7719 | 3177 | 7897  | 1768 |
| 2014/12/1<br>7 | 2416 | 1525 | 7797 | 3290 | 8356  | 2085 |
| 2014/12/2<br>4 | 2597 | 1607 | 7862 | 3384 | 9004  | 2582 |
| 2014/12/3<br>1 | 2707 | 1708 | 8018 | 3423 | 9446  | 2758 |
| 2015/1/7       | 2775 | 1781 | 8157 | 3496 | 9780  | 2943 |
| 2015/1/14      | 2806 | 1814 | 8331 | 3538 | 10124 | 3062 |
| 2015/1/21      | 2871 | 1876 | 8478 | 3605 | 10340 | 3145 |
| 2015/1/28      | 2917 | 1910 | 8622 | 3686 | 10518 | 3199 |
| 2015/2/4       | 2975 | 1944 | 8745 | 3746 | 10740 | 3276 |
